# Supplementary material for: Astrocytes Directly Influence Tumor Cell Invasion and Metastasis In Vivo
Source: PubMed Central journal article supplement (PMC3851470; doi:10.1371/journal.pone.0080933), 2013-12-04

# Figure S4

**A** MDA-MB-231P5D-Luc (n=8) MDA-MB-231P5A-Luc (n=10) MDA-MB-231P5A/ONO4817-Luc (n=10)

Days 1 7 10 14 21 28 35 42 1 7 10 14 21 28 35 42 1 7 10 14 21 28 35 42

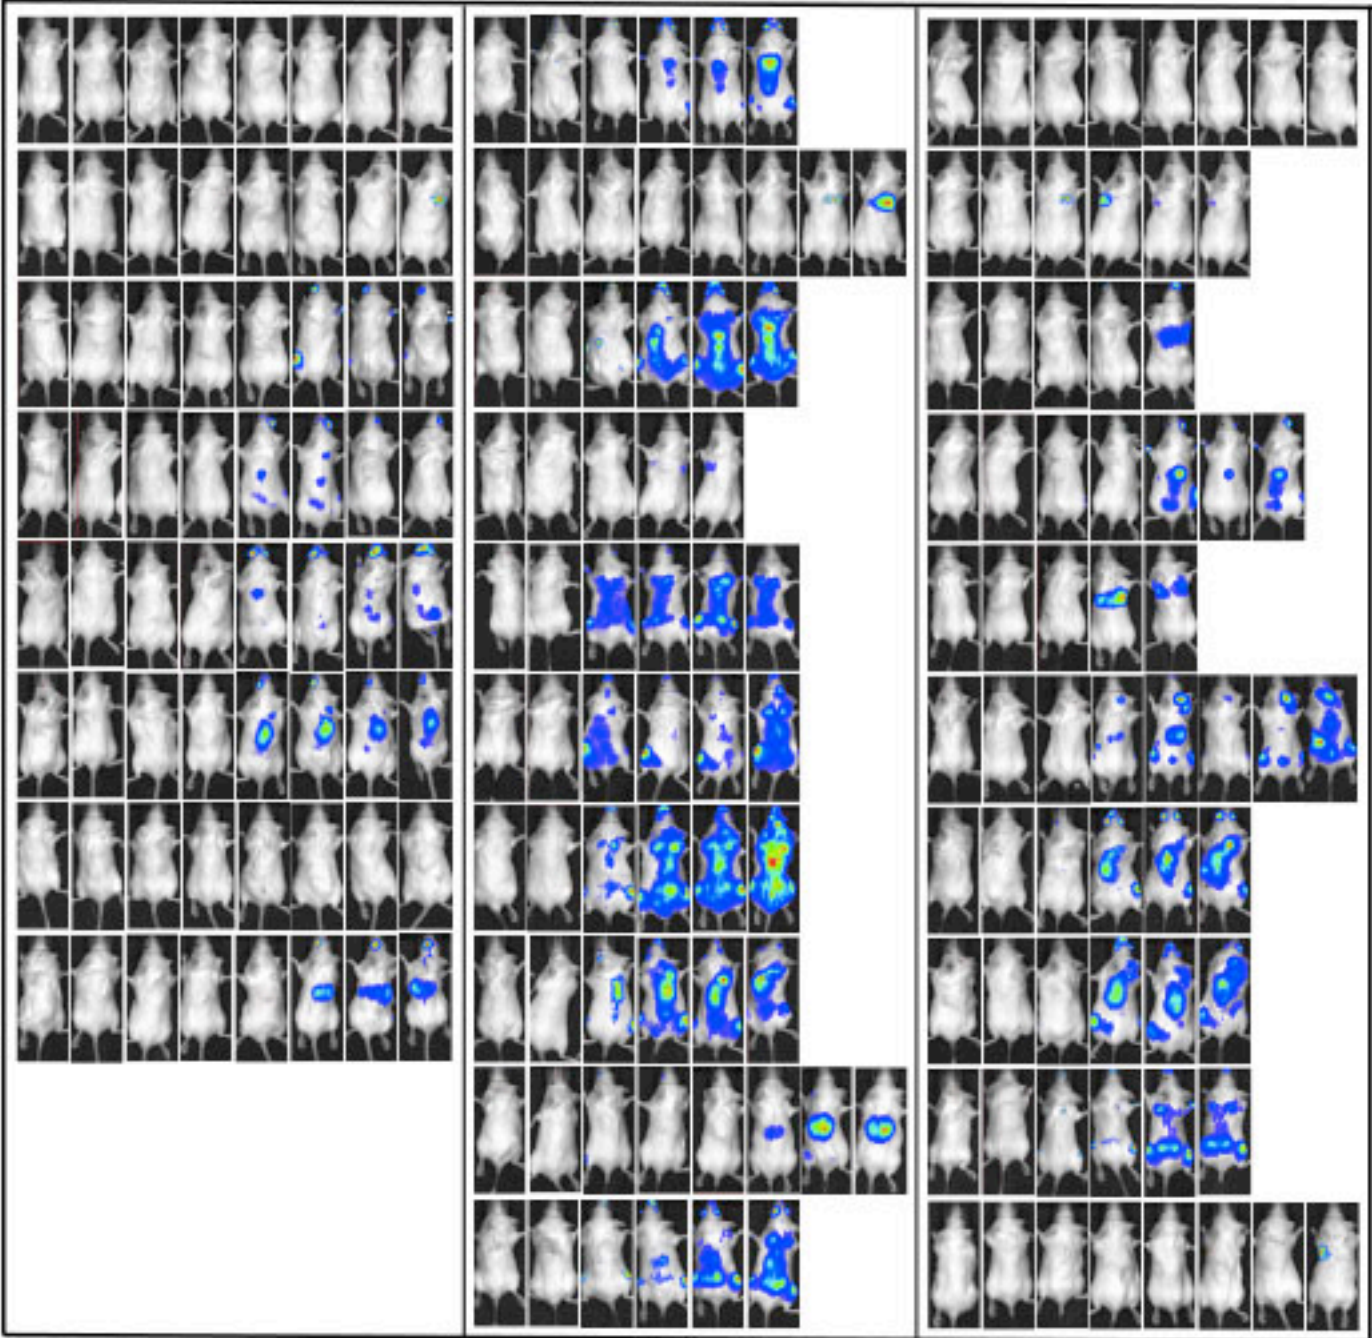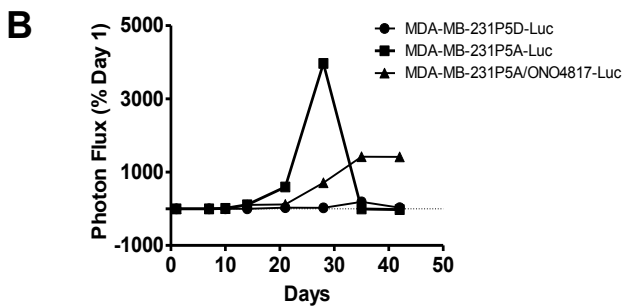

Supplement: pone.0080933.s004.pdf [file pone.0080933.s004.pdf]
