# Supplementary material for: Astrocytes Directly Influence Tumor Cell Invasion and Metastasis In Vivo
Source: PubMed Central journal article supplement (PMC3851470; doi:10.1371/journal.pone.0080933), 2013-12-04

# Figure S6

## A

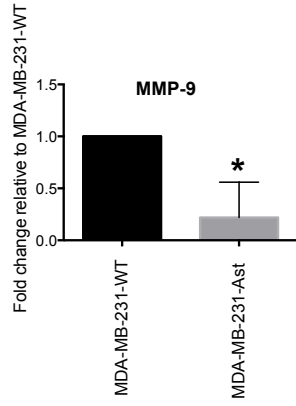

## B

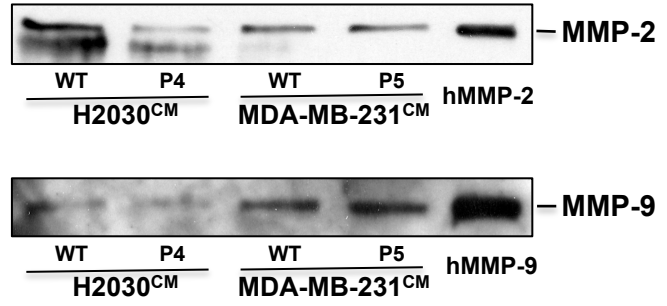

Supplement: pone.0080933.s006.pdf [file pone.0080933.s006.pdf]
