# Supplementary material for: Astrocytes Directly Influence Tumor Cell Invasion and Metastasis In Vivo
Source: PubMed Central journal article supplement (PMC3851470; doi:10.1371/journal.pone.0080933), 2013-12-04
Supplement: pone.0080933.s007.pdf [file pone.0080933.s007.pdf]

# Table S1

**Table S1. Molecular Weight of identified astrocyte-secreted chemokines**

| Molecular Weight (kDa) | < 50                                                                                                                                                                                                                                                                                               | 50-100                  | > 100   |
|------------------------|----------------------------------------------------------------------------------------------------------------------------------------------------------------------------------------------------------------------------------------------------------------------------------------------------|-------------------------|---------|
| <b>Chemokines</b>      | IL-1 $\beta$ , IL-6, IL-8, IL-10<br>IL-17, IL-27, TNF- $\alpha$ ,<br>TGF- $\alpha$ , TGF- $\beta$ , BMP2.<br>BMP4, Noggin, BMPRIA,<br>BMPRIB, BMPRII, IFN- $\gamma$ 17,<br>IFN- $\beta$ , CCL2 , CCL23,<br>CCL5, CXCL10, CXCL12,<br>Lipocalin-2, VEGF<br>Fibronectin. 6RANTES,<br>BDNF, GFAP, IGF. | MMP9,<br>MMP3,<br>MMP2. | Nestin. |
