# Supplementary material for: Astrocytes Directly Influence Tumor Cell Invasion and Metastasis In Vivo
Source: PubMed Central journal article supplement (PMC3851470; doi:10.1371/journal.pone.0080933), 2013-12-04
Supplement: pone.0080933.s008.pdf [file pone.0080933.s008.pdf]

**Table S2. Astrocyte secretome-induced tumor metastasize**

| <b>Group</b>             | <b>Mouse</b> | <b>Tumor</b> | <b>Brain Metastasis</b> | <b>Survival</b> |
|--------------------------|--------------|--------------|-------------------------|-----------------|
| <b>MDA-MB-231P5D-Luc</b> | <b>7</b>     | <b>4</b>     | <b>1</b>                | <b>6</b>        |
| <b>MDA-MB-231P5A-Luc</b> | <b>8</b>     | <b>8</b>     | <b>6</b>                | <b>0</b>        |
| <b>MDA-MB-231Br-Luc</b>  | <b>6</b>     | <b>6</b>     | <b>4</b>                | <b>5</b>        |
