# Supplementary material for: Astrocytes Directly Influence Tumor Cell Invasion and Metastasis In Vivo
Source: PubMed Central journal article supplement (PMC3851470; doi:10.1371/journal.pone.0080933), 2013-12-04
Supplement: pone.0080933.s009.pdf [file pone.0080933.s009.pdf]

**Table S3. Effects of MMP-2/-9 on astrocyte secretome-induced tumor metastasis**

| <b>Group</b>                          | <b>Mouse</b> | <b>Tumor</b> | <b>Brain Metastasis</b> | <b>Survival</b> |
|---------------------------------------|--------------|--------------|-------------------------|-----------------|
| <b>MDA-MB-231P5D-Luc</b>              | <b>8</b>     | <b>6</b>     | <b>5</b>                | <b>10</b>       |
| <b>MDA-MB-231P5A-Luc</b>              | <b>10</b>    | <b>10</b>    | <b>8</b>                | <b>2</b>        |
| <b>MDA-MB-231P5A/<br/>ONO4817-Luc</b> | <b>10</b>    | <b>9</b>     | <b>6</b>                | <b>3</b>        |
